# Supplementary material
Source: PubMed Central journal article supplement (PMC4688115)

**Supplemental Figure S1.** Nonlinear effect of the Daily Life Experiences of Racism and Bother (DLE-B) score on preterm delivery rates among women who reported lower amounts of perceived stress.

**Legend:** X axis represents the Daily Life Experiences of Racism and Bother (DLE-B) score. The Y axis represent the predicted probability of preterm birth. Solid line represents the predicted probability of preterm birth among women with lower perceived stress. Dashed line represents 95% confidence interval. Estimates are adjusted for maternal age, subjective financial situation, prenatal smoking, overall self-reported physical health and depressive symptoms. Note: DLE-B scores above the 95<sup>th</sup> percentile are not shown.

**Supplemental Figure S2.** Nonlinear effect of the Daily Life Experiences of Racism and Bother (DLE-B) score on preterm delivery rates among women who reported higher amounts of perceived stress.

**Legend:** X axis represents the Daily Life Experiences of Racism and Bother (DLE-B) score. The Y axis represent the predicted probability of preterm birth. Solid line represents the predicted probability of preterm birth among women with higher perceived stress. Dashed line represents 95% confidence interval. Estimates are adjusted for maternal age, subjective financial situation, prenatal smoking, overall self-reported physical health and depressive symptoms. Note: DLE-B scores above the 95<sup>th</sup> percentile are not shown.

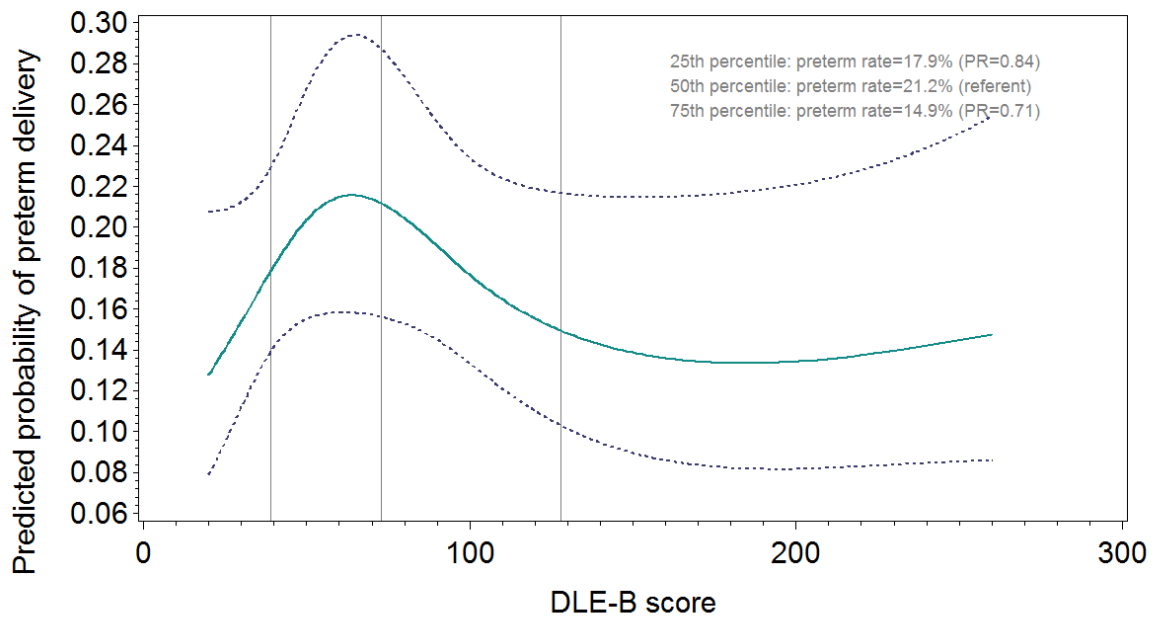

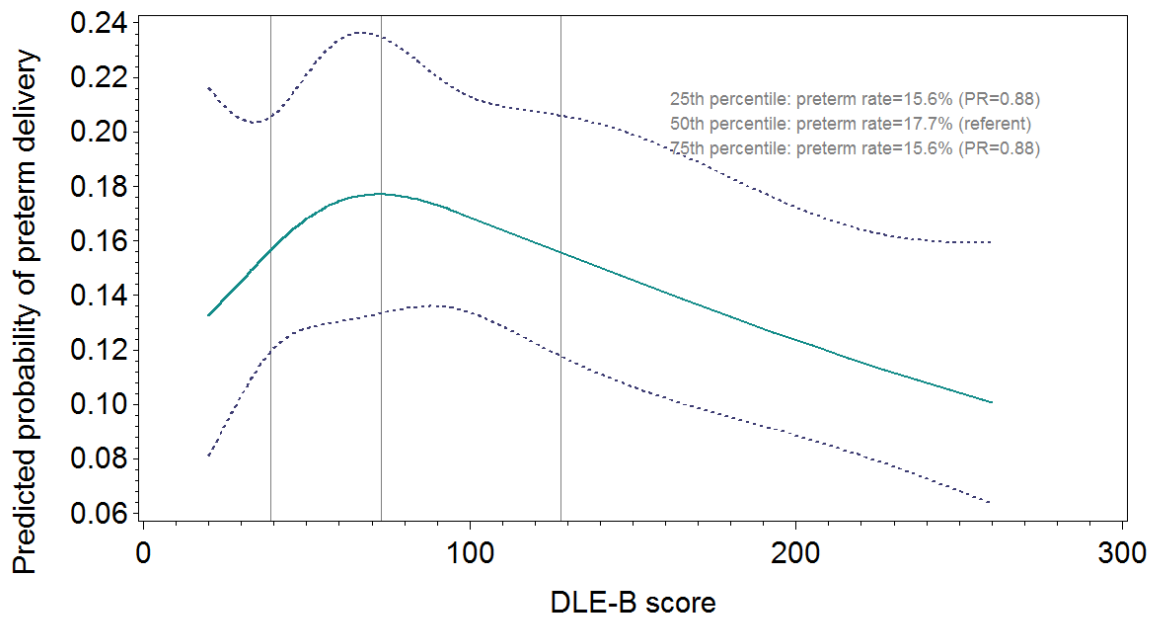

Supplement: NIHMS731569-supplement-supplement_1.pdf [file NIHMS731569-supplement-supplement_1.pdf]
